# Supplementary material for: Molecular characterisation of the Chlamydia pecorum plasmid from porcine, ovine, bovine, and koala strains indicates plasmid-strain co-evolution
Source: PeerJ journal article supplement (doi:10.7717/peerj.1661), 2016-02-04
Supplement: Supplemental_TableS1.pdf [file Supplemental_TableS1.pdf]

Table S1. Primers used for generating plasmid (pCpec) fragments and their characteristics.

| Primer name        | Sequence 5' - 3'            | Primer length (bp) | Annealing temperature (T <sub>m</sub> °C) | Region on the plasmid <sup>^</sup> | Amplified fragment (bp)    |
|--------------------|-----------------------------|--------------------|-------------------------------------------|------------------------------------|----------------------------|
| <b>Start For</b>   | TAG CTC GTA ATA CGT GTG G   | 19                 | 56                                        | 775                                | 792                        |
| <b>Start Rev</b>   | ATG AGG CAG AGT GTG AAC C   | 19                 | 58                                        | 1                                  |                            |
| <b>P1 frag For</b> | GTT CAC ACT CTG CCT CAT C   | 19                 | 60                                        | 7046                               | 522                        |
| <b>P frag Rev</b>  | CCT ATT TAT TGG CGT CTA GG  | 20                 | 58                                        | 19                                 |                            |
| <b>PG6 For</b>     | GCA GAA TTG GGT AGT CCT TG  | 20                 | 60                                        | 7127                               | 802                        |
| <b>Par Rev</b>     | TCA ATC TTT AGA AGT TTT GGG | 21                 | 56                                        | 6325                               |                            |
| <b>Par For</b>     | CTT CTA AAG ATT GAT CTA GGT | 21                 | 56                                        | 6338                               | 702                        |
| <b>PG4 Rev</b>     | ATA CTG AAC CTC CTA AAT CG  | 20                 | 56                                        | 5636                               |                            |
| <b>PG4 For</b>     | ATC TAT AAT CGG AGA ATC TGG | 21                 | 58                                        | 5701                               | 836                        |
| <b>PG3 Rev</b>     | AGA ATT GAT AGA AGA TGT GC  | 20                 | 54                                        | 4865                               |                            |
| <b>PG3 For</b>     | GTT CCC ATT TGG CAT TGC GT  | 20                 | 60                                        | 5297                               | 1213                       |
| <b>PG2 Rev</b>     | TTG AAC CAT GCC CTA TTA TCG | 21                 | 60                                        | 4084                               |                            |
| <b>PG2 For</b>     | GCT GTG CTG ACA ATC CAG T   | 19                 | 58                                        | 4225                               | 918                        |
| <b>Hel Rev</b>     | GGT CAA ATA GAA CAA GAT GCT | 21                 | 56                                        | 3307                               |                            |
| <b>Hel For</b>     | AGC ATC TTG TTC TAT TTG ACC | 21                 | 54                                        | 3327                               | 840                        |
| <b>Hel 2 Rev</b>   | CAA AGA AAT TCA TAG GTA TCC | 21                 | 56                                        | 2487                               |                            |
| <b>Hel 2 For</b>   | TGA TCT ACA AGA GTA TAT GG  | 20                 | 54                                        | 2540                               | 840                        |
| <b>PG8 Rev</b>     | AGA GAC TAT CTT CTG TGG G   | 19                 | 56                                        | 1700                               |                            |
| <b>PG8 For</b>     | TCA CTA AAT ACA CAT ACA GCC | 21                 | 54                                        | 1856                               | 739                        |
| <b>P8 2 Rev</b>    | GAG TCC GAA CAT CCA AGA CG  | 20                 | 62                                        | 1119                               |                            |
| <b>P8 2 For</b>    | CGA TTG GTT AAT AGC ACA GAC | 21                 | 60                                        | 1481                               | 749                        |
| <b>End Rev</b>     | ATT GGC AGA ACA TGA TGC TC  | 20                 | 58                                        | 735                                |                            |
| <b>PGP3 Rev</b>    | TTA ATC ATG GGT AAT TCA GG  | 20                 | 54                                        | 4566                               | In combination with others |

<sup>^</sup>: 1 at putative ORI (See plasmid map, Figure 1).
